## ***In silico Drosophila Patient Model Reveals Optimal Combinatorial Therapies for Colorectal Cancer***

Mahnour Naseer Gondal<sup>1</sup>, Rida Nasir Butt<sup>1</sup>, Osama Shiraz Shah<sup>1</sup>, Zainab Nasir<sup>1</sup>, Risham Hussain<sup>1</sup>, Huma Khawar<sup>1</sup>, Muhammad Tariq<sup>2</sup>, Amir Faisal<sup>3</sup>, Safee Ullah Chaudhary<sup>1,\*</sup>

<sup>1</sup> *Biomedical Informatics Research Laboratory, Department of Biology, Lahore University of Management Sciences, Lahore 54792, Pakistan*

<sup>2</sup> *Epigenetics Laboratory, Department of Biology, Lahore University of Management Sciences, Lahore 54792, Pakistan*

<sup>3</sup> *Cancer Therapeutics Laboratory, Department of Biology, Lahore University of Management Sciences, Lahore 54792, Pakistan*

\* Corresponding author.

E-mail: [safee.ullah.chaudhary@gmail.com](mailto:safee.ullah.chaudhary@gmail.com) (Chaudhary S U)

**Running title:** *Gondal M N et al / In silico Drosophila Patient Model*

## Abstract

*In silico* models of biomolecular regulation in cancer, annotated with patient-specific gene expression data can aid in the development of novel personalized cancer therapeutics strategies. *Drosophila melanogaster* is a well-established animal model that is increasingly being employed to evaluate preclinical personalized cancer therapies. Here, we report five Boolean network models of biomolecular regulation in cells lining the *Drosophila* midgut epithelium and annotate them with patient-specific mutation data to develop an *in silico Drosophila Patient Model* (DPM). The network models were validated against cell-type-specific RNA-seq gene expression data from the FlyGut-seq database and through three literature-based case studies on colorectal cancer. The results obtained from the study help elucidate cell fate evolution in colorectal tumorigenesis, validate cytotoxicity of nine FDA-approved cancer drugs, and devise optimal personalized drug treatment combinations. The proposed personalized therapeutics approach also helped identify synergistic combinations of chemotherapy (paclitaxel) with targeted therapies (pazopanib, or ruxolitinib) for treating colorectal cancer. In conclusion, this work provides a novel roadmap for decoding colorectal tumorigenesis and in the development of personalized cancer therapeutics through a DPM.

**KEYWORDS:** Personalized *in silico* cancer models; Boolean network models; Cancer systems biology; Preclinical *in silico* drug screening; Combinatorial therapeutics

## Introduction

Cancer development is a multistep process that is driven by a heterogeneous combination of somatic mutations at the genetic and epigenetic levels [1,2]. Specific mutations in oncogenes [3] and tumor suppressor genes, [4,5] that result in their activation and inactivation, respectively, manifest themselves at tissue-level in the form of polyps, multi-layering, and metastasis [1,6,7]. These system-level properties resulting from heterogeneous biomolecular aberrations are also acclaimed as “*hallmarks of cancer*” [1,7]. The heterogeneity amongst individual cancer cells stems from factors such as genomic instability, clonal evolution, and variations in the microenvironment [8,9]. This fosters plasticity in cancer cells which leads to drug resistance – a leading impediment in the treatment of the disease [8–10]. As a result, despite major research initiatives and resultant advancements in decoding the molecular basis of cancer, a comprehensive treatment for the disease still alludes researchers. The limited therapeutic regimens approved by the Food and Drug Administration (FDA) [11–13] exhibit variable efficacies across patients besides a multitude of toxic side effects and, multi-drug resistance [14].

Towards designing efficacious personalized cancer therapeutics, recent advances in high-throughput omics-based approaches complemented by patient-specific gene expression data can provide significant assistance [15,16]. Several online databases and portals provide such freely available datasets including cBioPortal [17], The Cancer Genome Atlas (TCGA) [18], and International Cancer Genome Consortium (ICGC) [19] amongst others [20–22]. However, effective and seamless utilization of such patient-specific genomic data to design personalized cancer therapies is still a fledgling area. Researchers are increasingly employing whole-animal models [23–26] such as mouse, zebrafish, and fruit fly for preclinical *in vivo* validation of therapeutic hypotheses generated from personalized therapeutics studies. Amongst the animal models, *Drosophila melanogaster* has become a popular platform for gene manipulation, investigating site-specific changes in the genome, and high-throughput whole-animal screening [15,27]. Importantly, a comparative study of human and fly genome showed that 60% of disease causing genes in humans are conserved in *Drosophila* [28,29]. Additionally, ease of handling and significantly lower genetic redundancy imparts further advantage to the employment of fly models [5]. As a result, over 50 different data repositories, and tools are now available for hosting data on the fly genome, RNAi screens, and expression data including *Flybase* [30], *FlyGut-seq* [31], *FlyAtlas* [32] databases. Specifically in the case of cancer, several *in vivo* studies have been designed to elicit novel

therapeutic targets using *Drosophila* model system [33–37]. One salient example is the validation of indomethacin, which is reported to enhance human Adenomatous Polyposis Coli (*hAPC*) induced phenotype in *Drosophila* eye [38] and therefore, employed for treating colorectal cancer (CRC). Vandetanib, another approved targeted therapy that was also validated by using *Drosophila* system, suppressed Ret activity, and was later approved for medullary thyroid carcinoma (MTC) [33,34].

However, a major shortcoming of using such mono-therapeutic agents for cancer treatment stems from the tumor heterogeneity which results in the selection of resistant cells [39,40] besides acting specifically on singular pathways. To overcome these issues, multiple therapeutic agents acting on multiple pathways in synergy can significantly increase drug efficacy, besides lowering the therapeutic dosage [40]. To evaluate potential high-efficacy synergistic drug combinations, researchers have employed *Drosophila* model in preclinical studies to elicit optimal drug combinations [36,37]. The *Drosophila* Lung Cancer Model by Levine *et al.* [36] helped identify trametinib and fluvastatin as combinatorial drug therapy for lung cancer. Further, an EGFR induced lung tumor model was also designed in *Drosophila* which assisted in providing an alternative combination of drugs for lung cancer treatment through screening an FDA-approved compound library [37]. However, combinatorial therapies pose unique challenges such as multidrug resistance in chemotherapy [14] and cross drug resistance [41,42] besides the continuing need for higher therapeutic efficacies [43]. Towards tackling these issues, researchers are now ‘personalizing’ live animal platforms for employment in preclinical studies to design efficacious therapeutic regimens. For instance, a comprehensive state-of-the-art *in vivo Drosophila Patient Model* using a personalized therapeutics approach was described in flies [44]. This particular study involved genetic manipulation of the fly genome to induce mutations specific to KRAS-mutant metastatic colorectal cancer. Combinatorial therapies were then given to the transgenic flies, harbouring mutations that were identified in the patient, to discover high-efficacy synergistic drug combinations.

Here, we propose an *in silico* counterpart of the *in vivo Drosophila Patient Model* (DPM) which will facilitate in the modeling and analysis of patient-specified CRC models besides overcoming the challenges of administering combinatorial therapies in animal models [45,46]. We have constructed five biomolecular network models of cells regulating the maintenance of adult *Drosophila* midgut epithelium lining. These include multipotent intestinal stem cells (ISCs) [47–51], enteroblasts (EBs) [52], enterocytes (ECs) [53–56], enteroendocrine cells (EEs) [57] and visceral muscle (VM) cells [58]. Next, we evaluated each network’s ability to program cell fates in normal conditions as well as under minor perturbations. The networks were then subjected to three types of inputs including

physiological inputs (referred to as “*normal*”), aberrant inputs such that the fly homeostatic midgut regulation is perturbed (referred to as “*stress*”), and oncogenic inputs (referred to as “*cancer*”). The cell fate outcomes under normal and cancer conditions were validated against published literature. The individual output node propensities were also validated against RNA-seq gene expression values taken from FlyGut-*seq* [31,59] database. Finally, three literature-based case studies were constructed to further validate the proposed *in silico* DPM. The first case study replicates colorectal tumorigenesis under progressive mutations using Martorell’s CRC model [60]. In the second case study, we employed Markstein *et al.*’s [61] model to perform therapeutic interventions to validate the cytotoxicity of nine FDA-approved drugs. Finally, in the third case study, we reproduced Bangi’s KRAS-mutant CRC model [44] for evaluating optimal personalized drug treatment combinations by incorporating key patient-specific mutations into our model followed by combinatorial therapeutic screening. Building on these case studies, we devised a novel synergistic combination of paclitaxel (a chemotherapeutic agent) and pazopanib, and ruxolitinib (targeted therapies) for treating ten CRC patients taken from cBioPortal [17,62]. The results obtained from combinatorial chemo- and targeted therapies show up to 100% increase in anti-cancerous cell fates such as apoptosis and a 100% reduction in tumorigenesis promoting cell fates such as hyper-proliferation.

Taken together, we have proposed a computational framework in the form of an *in silico* DPM to provide personalized CRC therapeutics. This approach can help reduce cancer treatment costs and facilitate in the development of higher efficacy combinatorial therapies for cancer as well as to elucidate novel therapeutic targets.

## Results and discussion

### Network construction and robustness analysis of regulatory homeostasis in *Drosophila melanogaster* midgut

To investigate the biomolecular signaling regulating homeostasis in *Drosophila melanogaster* midgut, we undertook an extensive literature survey and constructed five cell-type-specific rules-based network models. These models correspond to the five cellular phenotypes lining the *Drosophila* midgut which include: intestinal stem cells (ISCs) [47–51], enteroblasts (EBs) [52], enterocytes (ECs) [53–56], enteroendocrine cells (EEs) [57], and visceral muscle (VM) [58] (Tables S1-5). The scheme of pathways integration for ISC, EB, EC, EE, and VM is provided in Figures S1-5 and the resultant network models consisted of 33 nodes and 51 edges, 30 nodes and 46 edges, 24 nodes and 36 edges, 24 nodes and 36 edges, and 27 nodes and 38 edges, respectively (**Figures 1A and B**, Figures S6-10).

Next, to evaluate the biological plausibility of the networks, we analyzed each network under normal conditions. Specifically, the biomolecular network of ISC–Apical cells exhibited extrusion, apoptosis, proliferation, and differentiation (or EB fate) with 0.182, 0.179, 0.168, and 0.168 propensities, respectively. EC network exhibited dpp production, and extrusion with corresponding propensities of 0.428, and 0.256. Lastly, for EB and VM cells, extrusion and dpp production were programmed with propensities of 0.335 and 0.450, respectively. Robustness analysis performed by inducing a 10% perturbation in the input stimuli showed the highest variations in ISC's propensity for apoptosis (SEM=0.0014). Similarly, for EB, EC, and VM, the highest variations in propensity were observed for apoptosis with SEM=0.0027, 0.0034, and 0.0024, respectively (**Figure 1C** and Figure S11). These results indicate that all five networks are biologically plausible as they exhibited robustness against random perturbations and are hence feasible for employment in onwards analyses [63,64] (Table S6 and Figure S12).



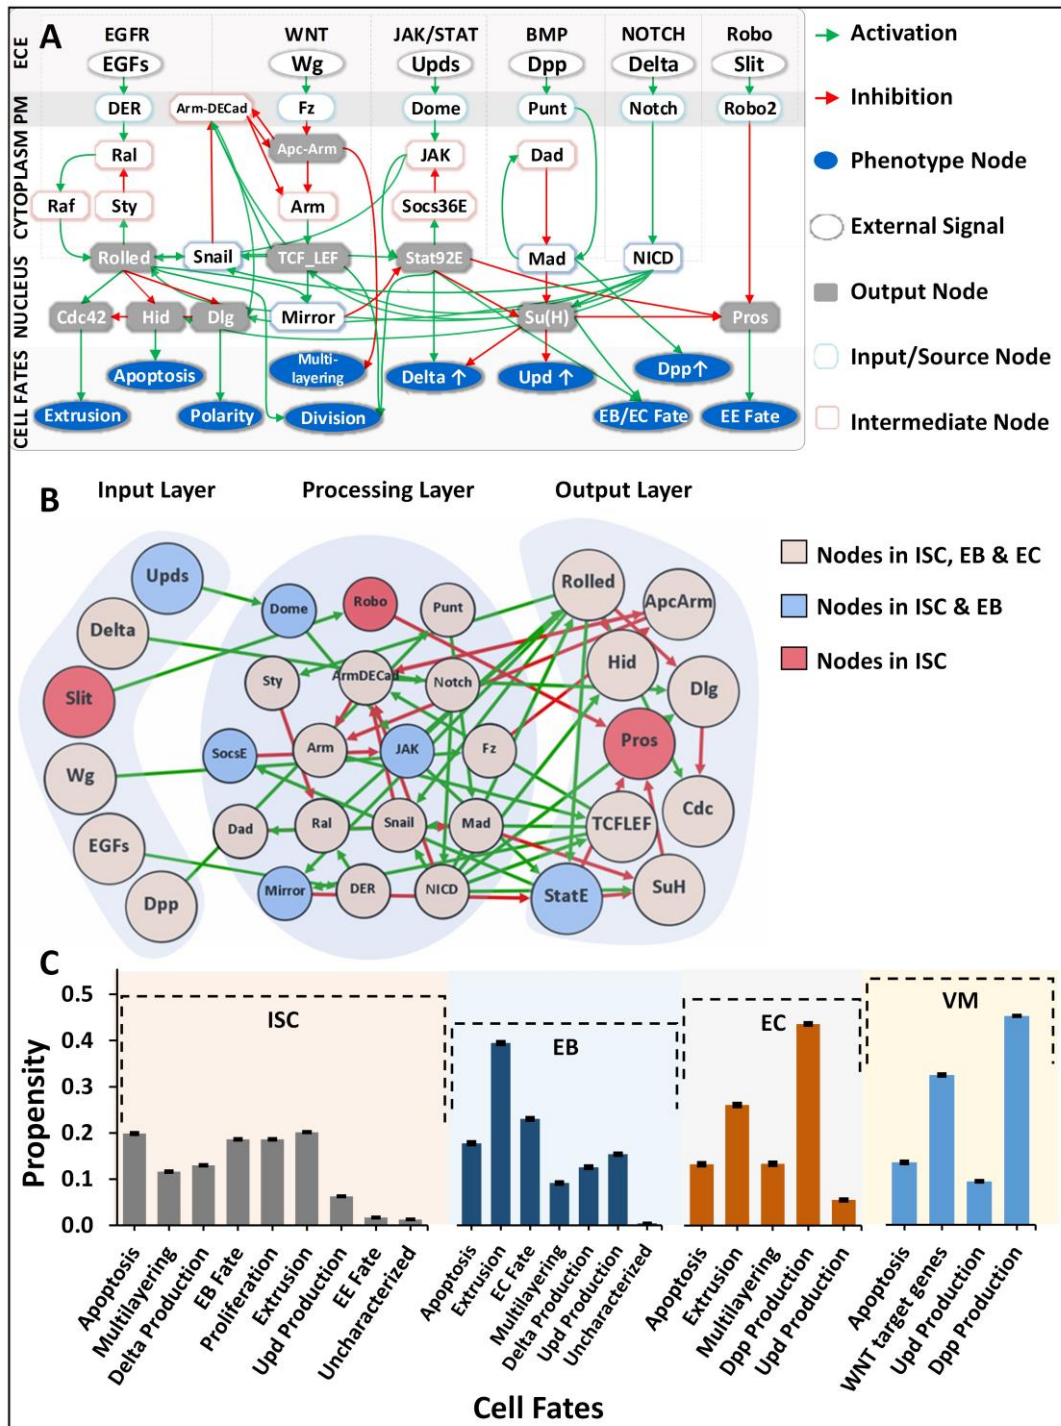

**Fig. 1. Regulatory schema of networks for the three cell types present in *Drosophila melanogaster* midgut.** (A) The overall scheme of six conserved pathways involved in the regulation and homeostasis of an adult *Drosophila* midgut. (B) The mapping between input, processing, and output nodes present in the biomolecular network models of three cell types i.e. ISC, EB, and EC. (C) Cellular fate propensities for ISC–Apical, EBs, ECs, and VM, along with their respective SEMs.

## **Evaluation and validation of biomolecular network models under normal, stress and colon cancer conditions**

To evaluate the proposed networks against published literature and RNA-seq data from FlyGut-*seq* [31], Deterministic Analysis (DA) was performed [65] under normal, stress, and cancerous conditions (construed as a combination of inputs) (Table S7). Results from our analyses (**Figure 2**) revealed that in normal conditions, ISC–Apical network programmed extrusion, apoptosis, proliferation, and differentiation (or EB fate) with propensities of 0.183, 0.178, 0.168, and 0.168, respectively (Table S8). Under stress conditions, the propensity for differentiation increased to 0.213, while proliferation, and extrusion reached to 0.211, and 0.213, respectively (see Materials and methods). Lastly, in cancerous conditions, propensities for multi-layering, and apoptosis increased to 0.317, and 0.225, respectively. The results were again validated from the literature which supports elevated apoptosis in ISC's when under extreme toxic conditions [66,67]. Literature reports also that ISCs upon encountering extreme stress, exhibit epithelium multi-layering, augmented by overgrowth [68]. Alongside, we also observed a reduction in proliferation, which corroborated with studies showing that tumor cells typically experience limited nutrient availability [69] which also slows down normal ISC cell division rate [70,71] (Figures S13-15).

For network regulation of ISC–Basal cells in physiological conditions (Table S7), the cell fate outcomes included differentiation (or EE fate), apoptosis and delta production, with propensities of 0.341, 0.264, and 0.132, respectively (Table S8). Under stress, Upd production fate increased (from 0.014 to 0.028), and differentiation rate decreased to 0.248. However, delta production remained steady. For cancer conditions, the propensity of differentiation and proliferation decreased to 0.149 and 0.020, respectively, whereas both apoptosis and multi-layering increased to 0.375 and 0.395, respectively. Both of these results, along with the relatively negligible delta expression, are in accordance with previously published reports. Moreover, extreme cellular environments are known to increase apoptosis rate in Enterocytes [66], suggesting that in absence of mutations, normal cells residing in toxic and oncogenic environments can be stressed leading to high apoptosis rates along with an inhibition of cell proliferation (Figures S16-18).

Next, we evaluated cell fate programming of the EB network under normal conditions (Table S7). The results showed extrusion, differentiation (or EC fate) and apoptosis cell fates with propensities of 0.335, 0.197, and 0.152, respectively (Table S8). Alongside, Upd production was also observed with a propensity of 0.130. However, in stress conditions, the propensity for apoptosis and multi-layering increased to 0.253 and 0.136, respectively, whereas, extrusion and differentiation (or



EC fate) decreased to 0.235, and 0.111, respectively. In cancerous conditions, the salient cell fates programmed included multi-layering, apoptosis, and extrusion with propensities of 0.381, 0.291, and 0.161, respectively. Also, differentiation was suppressed to 0.140 due to toxic cellular environments. The trend in cell fate propensities in cancerous conditions also exhibited multi-layering [68] along with low delta production and extrusion (Figures S19-21), which corroborates with published literature which states that delta is a known marker for ISC and in case ISC proliferation, is reduced along with delta production [66]. Extrusion is triggered by over population of cells [72], however, in high stress conditions, cells preferentially inhibit proliferation followed by an enhanced apoptosis thereby limiting extrusion.

Moreover, the EC network was also analyzed for response under normal conditions (Table S7). The emergent cell fates included dpp production, extrusion, and multi-layering with propensities of 0.429, 0.258, and 0.130, respectively (Table S8). Under stress, extrusion rate decreased to 0.101, while apoptosis and dpp production increased to 0.135 and 0.620, respectively. In cancer conditions, however, an increase in propensities of multi-layering (0.378) and apoptosis (0.295) was observed which is in agreement with published studies [66,68] (Figures S22-24).

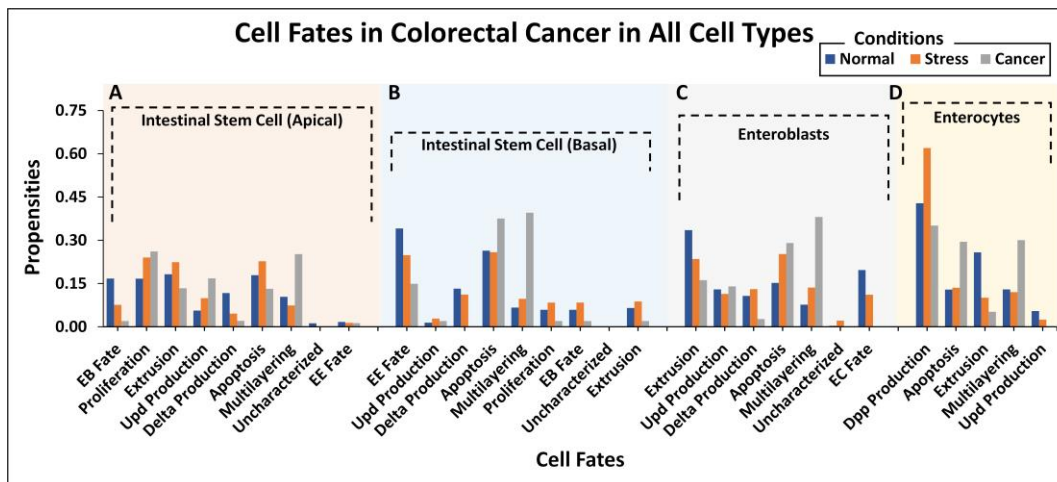

**Fig. 2. Stack bar chart representation of cell fate propensities for intestinal stem cells (ISCs) in apical and basal compartments, enteroblasts (EBs) and enterocytes (ECs) in normal, stress and cancer conditions.** (A) ISC–Apical cells adopt nine different cell fates while one remains uncharacterized in three ambient conditions. In normal conditions, the highest propensity was observed for extrusion followed by apoptosis, proliferation, and EB fate, in order. In the case of stress, the highest propensity is that of extrusion, followed by EB fate and proliferation. In cancer, the highest propensity is that of multi-layering, followed by apoptosis and extrusion. (B) ISC–Basal adopts nine different cell fates with the highest propensity being for EE fate in normal conditions, apoptosis in stress conditions while in the case of cancer, multi-layering and apoptosis showed the highest propensity. (C) Seven cellular fates in EB, with the highest propensity for extrusion in normal, apoptosis in stress, and multi-layering in cancer. (D) Five cellular fates in EC, with the highest propensity for dpp production in normal, stress and cancer conditions.

Lastly, a comparison of output node values for ISC–Apical, EB, and EC networks in normal conditions was performed against experimental RNA-seq data from the FlyGut-*seq* database [31]. Note that due to the paucity of regulatory dynamics in the literature on EE and VM cells, we could not evaluate their networks further. The output node propensities for ISC, EB, and EC were found to be comparable with values from the FlyGut-*seq* database [31] (**Figure 3** and Table S9).

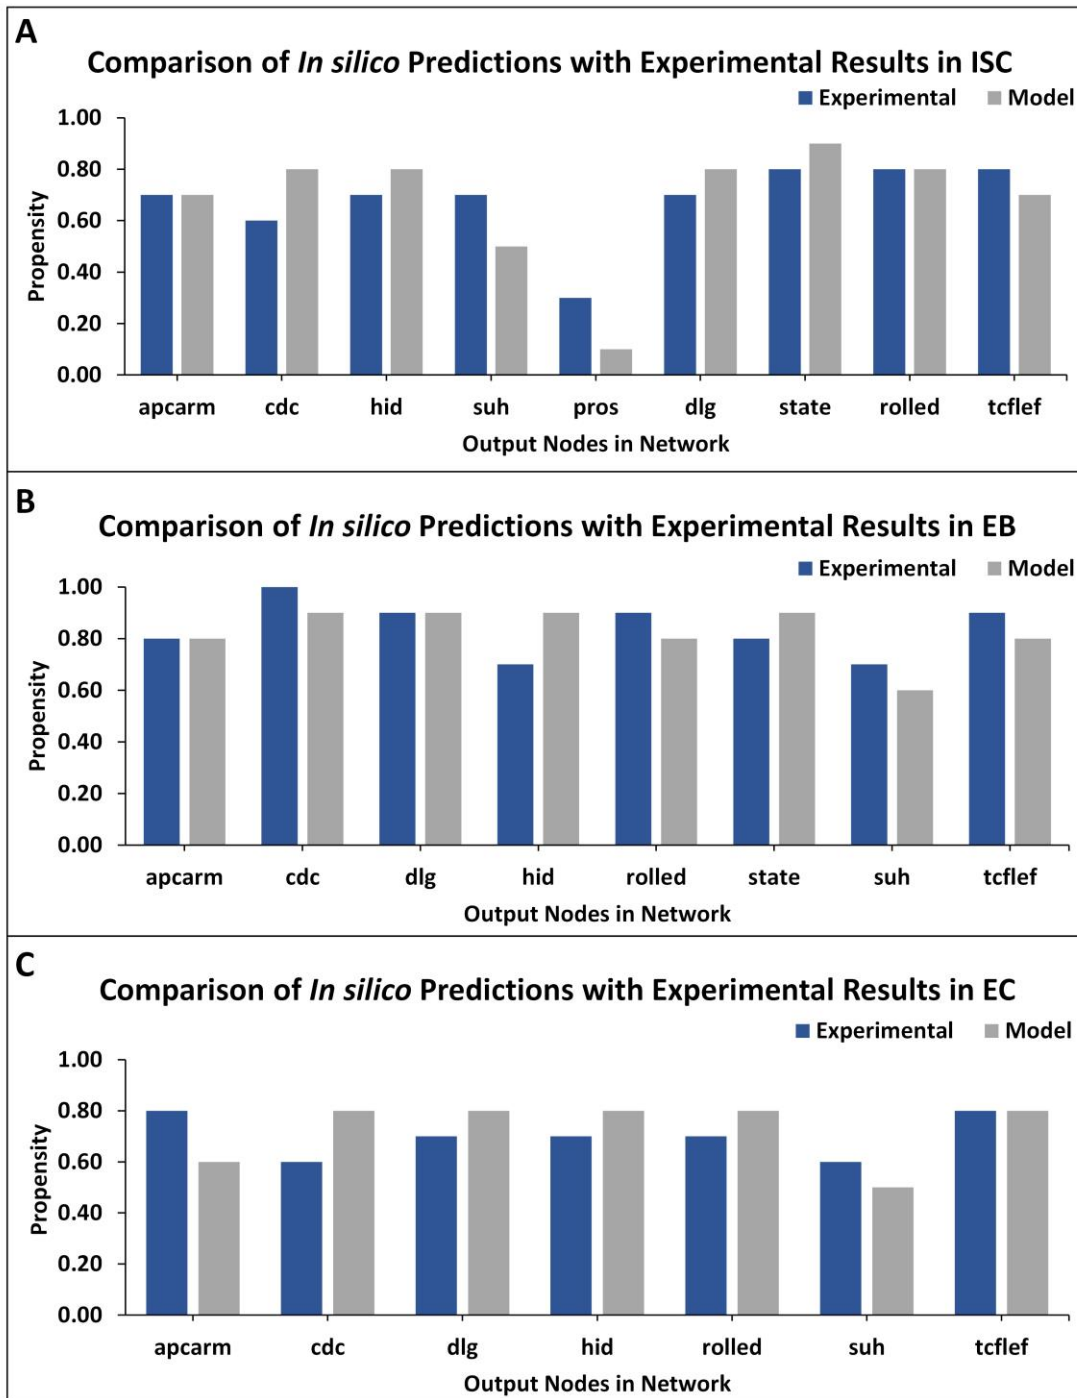

**Fig. 3. TISON output nodes propensities (*in silico* results) validation from FlyGut-seq database (*in vivo* results).** (A) Comparison of nine output nodes propensities in ISC–Apical network: adenomatous polyposis coli (*Apc2*), *cdc42* (*Cdc42*), head involution defective (*hid*), suppressor of hairless (*Su(H)*), prospero (*pros*), discs large 1 (*dlg1*), signal-transducer and activator of transcription protein at 92E (*Stat92E*), rolled (*rl*) and pangolin (*pan*). (B) Comparison of eight output nodes propensities in EB network: adenomatous polyposis coli (*Apc2*), *cdc42* (*Cdc42*), discs large 1 (*dlg1*), head involution defective (*hid*), rolled (*rl*), signal-transducer and activator of transcription protein at 92E (*Stat92E*), suppressor of hairless (*Su(H)*), and pangolin (*pan*). (C) Comparison of seven output nodes propensities in EC network: adenomatous polyposis coli (*Apc2*), *cdc42* (*Cdc42*), discs large 1 (*dlg1*), head involution defective (*hid*), rolled (*rl*), suppressor of hairless (*Su(H)*), and pangolin (*pan*) (Supplementary Table S10).

### Case Study 1 – Investigating colorectal tumorigenesis under progressive mutations in *Drosophila* midgut

To decode the emergent cell fates during initiation and progression of colorectal cancer (CRC) in the adult *Drosophila* midgut, two salient driver mutations [60] in adenomatous polyposis coli (*Apc*, in WNT pathway) [73] and Ras (in the EGFR pathway) [74] were incorporated into the ISC–Apical network. These mutations were initially incorporated to act individually and later simultaneously (Figure S25). The emergent cell fates in the control case included apoptosis, proliferation, and differentiation, along with loss of polarity, multi-layering, and extrusion with propensities of 0.180, 0.168, 0.168, 0.00, 0.105 and 0.182, respectively. Upon incorporation of *Apc* mutation into the ISC–Apical network, a slight decrease in apoptosis and proliferation was observed as their propensities decreased to 0.165 and 0.138, respectively. Differentiation and extrusion also got reduced to 0.138 and 0.148, respectively, while multi-layering increased to 0.349, and loss of polarity remained unaffected. Next, upon introducing Ras mutation, a decrease in apoptosis (0.089) and an increase in proliferation (0.186) was observed, which indicated cellular overgrowth. Furthermore, in line with Martorell *et al.* [60], differentiation remained unchanged while the loss of polarity and extrusion increased to 0.089 and 0.255, respectively.

On the other hand, the concurrent incorporation of *Apc* and Ras mutations resulted in hyper-proliferation and overgrowth as apoptosis decreased to 0.066 and proliferation increased to 0.203. Differentiation rate was observed to be 0.138 and loss of polarity, multi-layering and extrusion increased to 0.066, 0.203, and 0.203, respectively. Hence, with concurrent mutations in *Apc* and Ras, the emergent cell fates started exhibiting the hallmarks of cancer including abnormal proliferation and loss of differentiation, etc [75]. These results were also coherent with both the experimental findings reported by Martorell *et al.* [60] (Figure 4 and Table S11) and differential gene expression data [76] (Table S12).

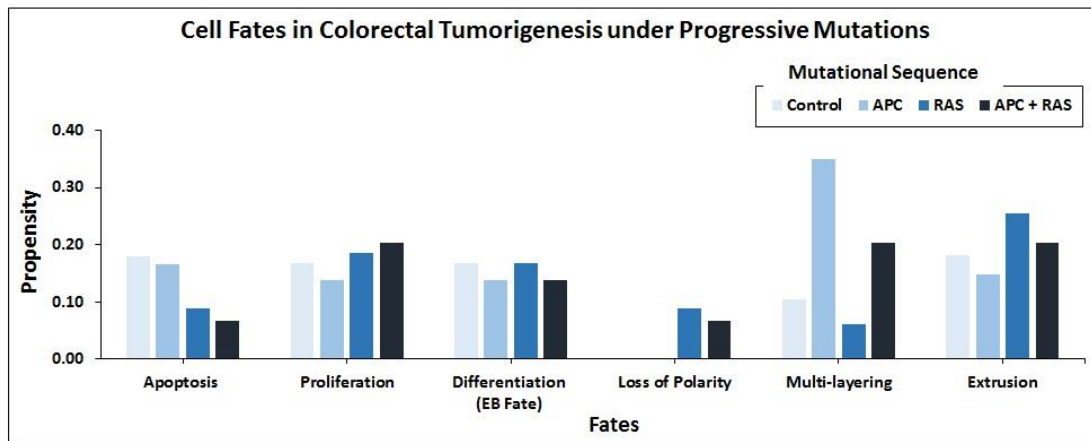

**Fig. 4. Cell fate outcomes after the introduction of progressive CRC mutations and their validation against Martorell *et al.*'s *Drosophila* CRC model.** A high rate of extrusion and loss of polarity was observed in *Apc-Ras* as well as *Ras* clones. Alongside, an increased proliferation rate with a decreased apoptosis and differentiation is also highlighted by Martorell *et al.* in their *in vivo* model.

#### **Case Study 2 – Therapeutic evaluation of CRC in *Drosophila* midgut using targets from the literature**

Introduction of gain-of-function Raf-specific driver mutations in our ISC–Apical network enabled the replication of Markstein *et al.*'s [61] therapeutic screen towards a comparative cytotoxicity evaluation of nine FDA-approved drugs. In their gain-of-function Raf tumor model, Markstein and colleagues had classified FDA approved drugs into class I and II drugs. According to the study class I drugs induced CRC reversal in mutated cells without effecting the wild type cells, whereas class II drugs besides reversing CRC in mutated cells, also induced CRC in wild type cells (Table S13). The result of our network analysis of the control case exhibited proliferation and apoptosis with propensities of 0.167 and 0.179, respectively. However, after the induction of Raf mutations, proliferation (0.187) rate increased along with a decrease in apoptosis (0.088). Treatment of a Raf-mutated network using class I drugs led to a decrease in proliferation (0.108) and an increase in apoptosis (0.167). No effect was observed on proliferation, which remained steady at 0.168 whereas a slight decrease was observed in apoptosis (0.167) for the wild type in comparison with the control. This confirmed the action of class I drugs which act to significantly reduce cancerous fates in CRC without having a major impact on wild type cells.

Alternatively, in the case of class II drugs, the wild type also exhibited hyper-proliferation after therapy with its propensity reaching up to 0.240 and apoptosis decreasing to 0.068. Importantly, for the CRC network, drug action continued to show cancer reversal with the propensity of proliferation around 0.108 and apoptosis at 0.132. These results suggest that class II drugs are indeed associated

with drug cytotoxicity as they revert cancer phenotype but at the same time induce malignancy in normal cells under therapy. This again confirms Markstein *et al.*'s study which hypothesized that the extracellular environment in animal models is crucial in drug delivery and cytotoxicity (**Figure 5** and Table S14).

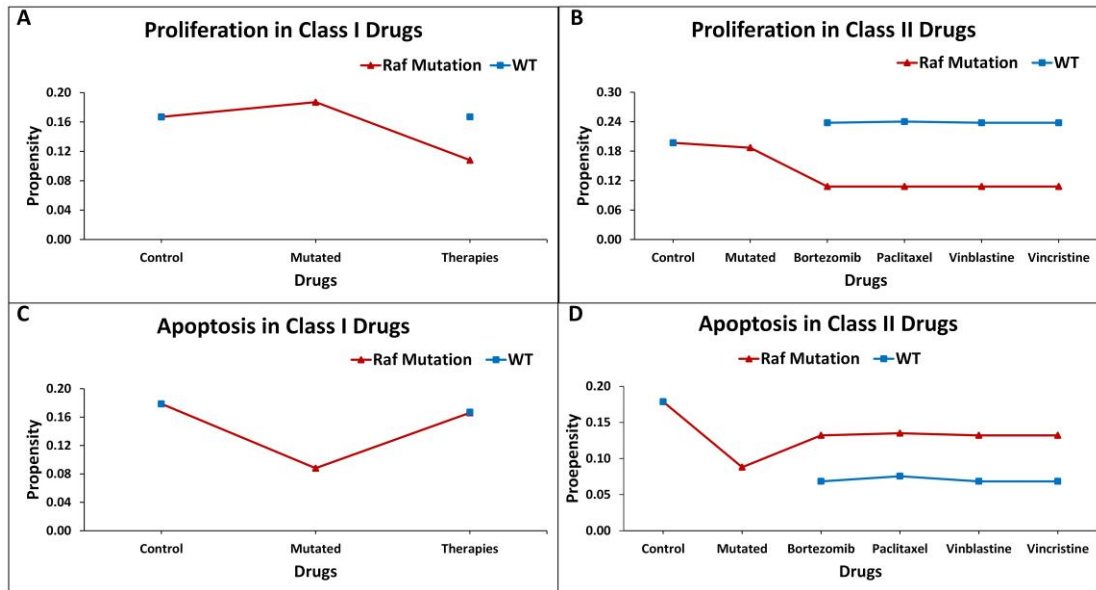

**Fig. 5. Evaluating cell fates under therapeutic screens taken from Markstein et al.'s *Drosophila* model.** (A) The effect of class I drugs on cell proliferation in wild type and CRC networks, (B) The effect of class II drugs on proliferation in wild type and CRC networks, (C) The effect of class I drugs on apoptosis in wild type and CRC mutated networks, (D) The effect of class II drugs on apoptosis in wild type and mutated network.

### Case Study 3 – Employing the *in silico Drosophila Patient Model* for personalized therapeutics

Towards developing a *Drosophila*-based platform for employment in orchestrating patient-centric cancer therapeutics, we adopted Bangi *et al.*'s [44] *in vivo Drosophila Patient Model* (DPM). The *in vivo* model was first translated into an *in silico* DPM which incorporated patient-specific mutations from Bangi *et al.*'s study. These mutations included eight tumor suppressors: Apc, Tp53, Fbxw7, Tgfbr2, Smarca4, Fat4, Mapk14, and Cdh1, along with one oncogenic mutation in Kras (Table S15). After inducing these patient-specific mutations into the ISC–Apical network, we administered the combinatorial therapy of trametinib and zoledronate. Our results showed that in control (i.e. healthy cells), the cell fate propensities for proliferation and apoptosis came out to be 0.167 and 0.182, respectively. Upon induction of mutations, proliferation increased to 0.250 and apoptosis decreased to 0.000, respectively. Next, with the administration of trametinib, an inhibitor of MEK kinase (mitogen-activated protein kinase kinase), used to treat patients with Kras mutation [44], the propensities for proliferation and apoptosis reverted to 0, however, upon augmentation of therapy with the addition of zoledronate in combination with trametinib, a decrease in proliferation to 0.168 and an increase in apoptosis to 0.131 was observed. These results exhibited cancer reversal on the administration of the drug combination and corroborate with Bangi *et al.*'s findings (**Figure 6**).

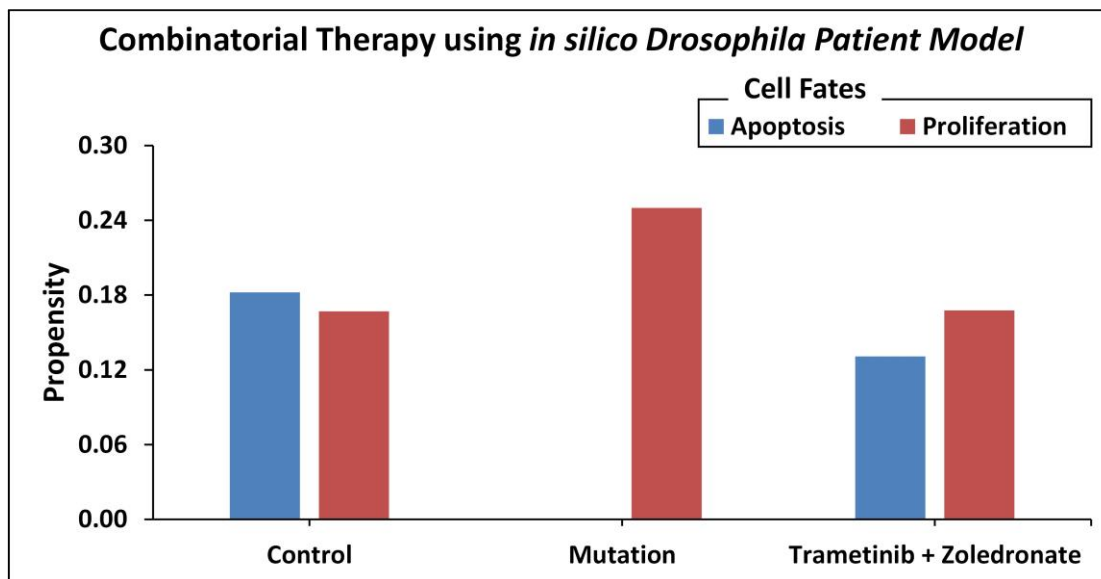

**Fig. 6.** Cell fate propensities obtained from the *in vivo Drosophila Patient Model* using Bangi *et al.*'s study.



## Identification and evaluation of personalized therapeutics for CRC patients using *in silico* DPM

Towards developing personalized combinatorial therapies for treating colorectal cancer patients, we coupled our *in silico* DPM with patient-specific gene expression data from cBioPortal [17]. Patient-specific potential druggable targets were identified and their oncogenic cell fate propensities were obtained using DA pipeline. Each node was then queried in the PanDrugs database [77] to find out the drugs that targeted them directly or indirectly (Table S16). The results from this exercise elicited paclitaxel [78] and several other targeted therapies including pazopanib, and ruxolitinib depending on patient-specific mutations (Table S17). Follow up literature review showed that these drugs and their combinations are currently being used in several studies and clinical trials [79–82]. Specifically, the combination of paclitaxel and ruxolitinib was evaluated in 2018 to treat human ovarian cancer [79], while the paclitaxel-pazopanib combination was evaluated for treating metastatic melanoma [80] and is in clinical trials for Non-Small Cell Lung Cancer (NSCLC) [81] as well as angiosarcoma [82].

To test the efficacy of these drug combinations in CRC patients, we administered these therapies using the proposed *in silico* DPMs to ten patients with colorectal adenocarcinoma obtained from cBioPortal [17]. To implement the simultaneous action of chemotherapy wherein the drug introduces widespread inhibition of mitosis by stabilizing polymerized microtubules and not allowing them to function during cell division for that, we surveyed the existing literature and constructed a microtubule network (Table S18) with 23 nodes and 28 edges (Figure S26). This network was then integrated into our existing ISC-Apical network to study the behaviour of microtubule stabilization-induced cell fates in chemotherapy (Table S19). The resultant integrated network consistent of 39 nodes and 64 edges (Figure S27). Our results from combinatorial chemo- and targeted therapy using the integrated network showed up to a 100% increase in apoptosis cell fate and a 100% decrease in proliferation rate (Table S20). With administration of targeted therapy only, our results showed up to a 600% increase in apoptosis cell fate and a 100% decrease in proliferation rate (**Figure 7** and Table S21).

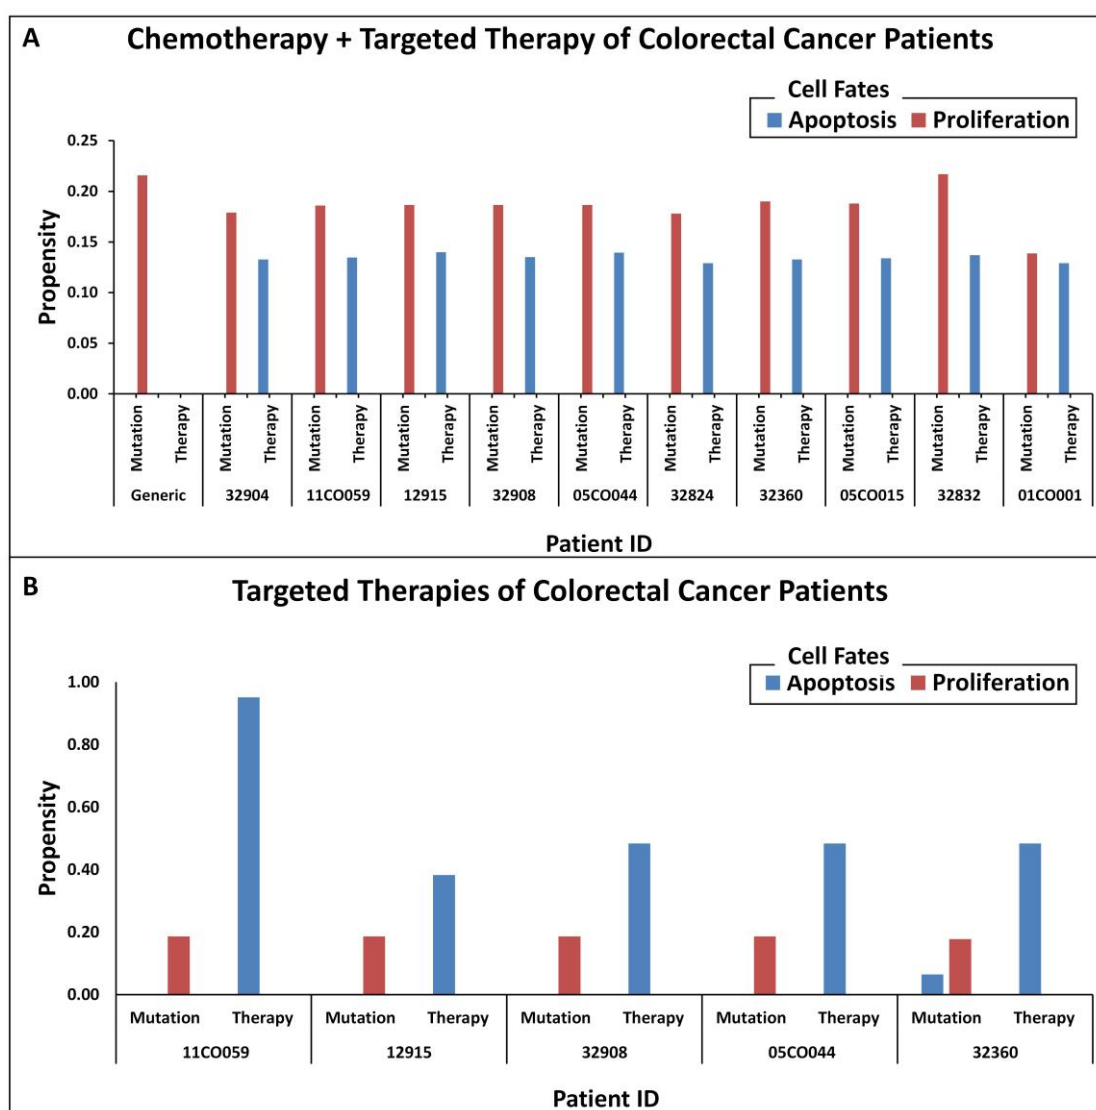

**Fig. 7. Comparison of oncogenic cell fate propensities obtained from chemotherapy + targeted therapy results versus targeted therapy results.** (A) Chemotherapy + targeted therapy for ten colorectal cancer patient for personalized screening. Patient ID and mutation data were extracted from cBioPortal and cell fates for apoptosis and proliferation were plotted to observe before and after therapy results, (B) Targeted therapy for five colorectal cancer patients for personalized screening. Patient ID and mutation data were extracted from cBioPortal and cell fates for apoptosis and proliferation were plotted to observe before and after therapy results.

## 1 **Conclusion**

2 Taken together, in our study we present a computational framework using a  
3 literature-derived *in silico Drosophila Patient Model* (DPM) for treating colorectal  
4 cancer (CRC). We carried out an extensive literature survey to construct five  
5 biomolecular network models (intestinal stem cells (ISCs) [47–51], enteroblasts (EBs)  
6 [52], enterocytes (ECs) [53–56], enteroendocrine cells (EEs) [57], and visceral muscle  
7 (VM) [58] regulating the maintenance of the epithelium in *Drosophila* midgut. The  
8 networks were analyzed in normal conditions for their robustness against minor  
9 perturbations followed by an evaluation in normal, stress, and cancer conditions. The  
10 network model was further validated against RNA-seq datasets from FlyGut-seq  
11 database as well as three literature-based case studies. Therapeutic screening using the  
12 proposed *in silico* DPM helped personalize treatment for individual patients taken  
13 from cBioPortal (Table S17). Outcomes from the *in silico* screening of ten patients  
14 highlight the need for a detailed evaluation of paclitaxel, a chemotherapeutic  
15 agent, and targeted therapy synergy to treat CRC patients. To the best of our  
16 knowledge, the proposed model is the first of its kind to model fly gut homeostasis  
17 and tumorigenesis using the five cells lining the midgut epithelium.

18 The proposed model can be deployed by wet-lab biologists in preclinical settings  
19 to evaluate potential drug targets before their *in vivo* evaluation. The flexibility  
20 offered by this model can also facilitate the incorporation of patient-specific gene  
21 expression data towards directly evaluating potential drugs. It will be interesting to  
22 employ the proposed model by investigating fly embryo formation and development  
23 by incorporating developmental genes. The *in silico* DPM further stands to strengthen  
24 the fly community by providing a tool for value addition in the development of novel  
25 therapeutic strategies using personalized therapeutics approaches.

26

## 1 **Materials and methods**

### 2 **Data collection and Boolean modeling of five cell-type-specific networks in** 3 ***Drosophila* midgut**

4 To construct the biomolecular network models involved in cellular regulation of  
5 *Drosophila* midgut, a comprehensive review of the existing literature and databases  
6 was undertaken. The databases employed included the Kyoto Encyclopedia of Genes  
7 and Genomes (KEGG) [83], *Drosophila* Interactions Database (DroID) [84], and data  
8 repositories such as FlyGut-*seq* [31], and Flybase [85]. Alongside, network models of  
9 *Drosophila* by Giot *et al.* [86], Formstecher *et al.* [87], and Toku *et al.* were used to  
10 construct five rule-based Boolean biomolecular networks of the conserved signaling  
11 pathways in intestinal stem cells (ISCs) [47–51], enteroblasts (EBs) [52], enterocytes  
12 (ECs) [53–56], enteroendocrine cells (EEs) [57], and visceral muscle (VM) [58]. Six  
13 major pathways involved in maintaining the overall homeostatic nature of the fly  
14 midgut were selected from the available literature. These included Notch [88], BMP  
15 [88], EGFR [89], WNT [90], JAK-STAT [90,91], and Robo [92] pathways for each  
16 cell type lining the midgut. The network steady states were used to program cell fate  
17 outcomes such as cellular differentiation, proliferation, apoptosis, EC fate  
18 determination, etc. Boolean equations [93] were used to model the regulation of each  
19 node in the biomolecular network. TISON, an in-house theatre for *in silico* systems  
20 oncology (<https://tison.lums.edu.pk>) was used to translate Boolean rules into network  
21 models (see Supplementary Data).

### 22 **Robustness analysis**

23 To validate the biological plausibility of the proposed networks, robustness analysis  
24 was performed. Physiological conditions were maintained during this process and the  
25 input node values were taken from the FlyGut-*seq* database [31,59]. The normal node  
26 states for ISC, EB, EC, and VM were perturbed by  $\pm 10\%$ . Bootstrapping was  
27 employed on 10,000 network states. The means and standard deviations of the  
28 emergent cell fates were then calculated and standard error of means (SEM) was

1 plotted for each cell fate to determine the biological plausibility of the scale-free  
2 networks [94] (see Supplementary Data 1).

### 3 **Deterministic analysis**

4 The Boolean network models were analyzed using Deterministic Analysis (DA)  
5 [65,95] performed in TISON, an in-house web-based multi-scale modeling platform  
6 for *in silico* systems oncology. The DA pipeline was derived from ATLANTIS [96].  
7 DA was used to identify ‘*cell fate attractors*’ – the most probable biological states of  
8 a cell and compute their propensities. TISON’s DA pipeline requires three different  
9 input files including (i) network file, (ii) fixed node states file, and (iii) cell fate  
10 classification file. The network file contained the Boolean rules for rules-based  
11 biomolecular networks. The fixed node states file contained fixed values for  
12 generating environmental conditions such as normal, stress, or cancer conditions. The  
13 cell fate classification file was used to map network states onto the biological cell  
14 fates in the light of particular cell fate markers [96] (Table S22). For DA,  
15 bootstrapping was employed on 10,000 network states. TISON’s *Therapeutics Editor*  
16 (TE) was used to undertake therapeutic evaluation on the network using the DA  
17 pipeline, with mutation and drug data integrated. Fixed node states for normal  
18 conditions were obtained from *FlyGut-seq* database while for cancer conditions,  
19 literature was surveyed to find out if the pathway is up or downregulated. For stress,  
20 abnormal values were abstracted by perturbing the stimuli in normal conditions (see  
21 Supplementary Data 2).

### 22 **Output node validation against *Flygut-seq* database**

23 To validate the output node propensities of ISC-Apical, EB, and EC networks with  
24 *FlyGut-seq* database, we exported the RNA-seq, rpkkm values, from the database. The  
25 dataset was then used to extract the relevant genes present in our networks (ISC, EB,  
26 and EC) using their biological names. Expression data across the five regions of the  
27 midgut (i.e. R1, R2, R3, and R5) [97] was normalized for each gene in specific cells.  
28 The normalized values were taken as normal input fixed node states for onwards

1 analyses. The normalized values were then compared with the output node  
2 propensities from DA that was performed in normal cell fate conditions in TISON  
3 (see Supplementary Data 2).

#### 4 **Cell fate data collection for case studies and their validation**

5 To validate and exemplify our network models, we used three literature-based case  
6 studies on colorectal tumorigenesis in *Drosophila melanogaster*. For case study 1,  
7 data including cell fates under Apc and Ras single and simultaneous mutations were  
8 obtained from Martorell *et al.*'s model [60]. The differential gene expression screens  
9 and data were also obtained from Martorell *et al.* [76] (see Supplementary Data 3).  
10 TISON's TE was used to implement the mutations in our network using TE's  
11 horizontal therapy pipeline. For case study 2, therapeutic screens including the  
12 existing list of FDA-approved drugs for targeting ISC in *Drosophila* were adapted  
13 from Markstein *et al.*'s [61] study. Existing databases on drugs and drug-gene  
14 interactions such as PharmacoDB [98], PanDrugs [77], and DGIdb [99], etc [100,101]  
15 were then used to identify nodes in our ISC–Apical network, which were targets of  
16 the drugs mentioned in Markstein *et al.*'s study. TE was employed to deliver drug  
17 data into the CRC mutated network using TE's vertical therapy pipeline. Different  
18 fixed node states and cell fate classification files were employed to perform network  
19 evaluations in wild type and CRC to mimic different cellular environments in normal  
20 and cancerous conditions (see Supplementary Data 4). For case study 3,  
21 patient-specific mutations, along with combination therapy drug candidates were  
22 taken from Bangi *et al.*'s [44] study. Drug databases were used to identify nodes in  
23 the ISC–Apical network which were targets of drugs mentioned in Bangi *et al.*'s  
24 study. Drugs which did not have direct targets in the network were implemented  
25 indirectly using literature-based mechanisms (see Supplementary Data 5).

#### 26 **Development of an *in silico* *Drosophila* Patient Model (DPM) and its validation**

27 Towards devising a novel drug combination for the treatment of colorectal  
28 tumorigenesis, we performed an exhaustive evaluation of each node in our ISC–



1 Apical network using TISON's TE therapy panel. For that, we started with the  
2 sensitivity analysis of both tumor suppressor genes and oncogenes involved in CRC  
3 using data from existing databases and literature [60,76,98,100,101] against  
4 patient-specific mutations taken from cBioPortal [17]. The therapeutic screening was  
5 performed by upregulating the tumor suppressors and downregulating the oncogenes  
6 (Table S23), to evaluate potential drug combination targets using PanDrugs [77]  
7 database, a platform that prioritizes direct and indirect targeting of genomic mutations  
8 (see Supplementary Data 6).

### 9 **Combination of chemotherapy and targeted therapy to treat CRC patients**

10 To induce the effect of chemotherapy we carried an extensive survey of the existing  
11 literature and constructed a microtubule network. The network consisted of 23 nodes  
12 and 28 edges. Next, this network was integrated with ISC-Apical network via up- and  
13 downstream signaling interaction. The resultant integrated network contained 39  
14 nodes and 64 interactions. This integrated network was then utilized for  
15 chemotherapeutic screening. The combinatorial personalized therapy was used to treat  
16 the CRC patients, in a vertical therapy scheme through targeting specific nodes in our  
17 ISC-Apical network in light of patient mutations. DA pipeline was used to carry out  
18 the therapeutic evaluation (see Supplementary Data 6).

19

## 1 **Authors' contributions**

2 SUC designed and supervised the study. MNG carried out the literature review,  
3 construction of the model, and undertook the analyses. MNG and RNB designed the  
4 personalized treatment pipeline, SUC, MNG, RNB, ZN, and HK drafted the  
5 manuscript. OSS helped construct Boolean networks. RH critically reviewed the  
6 model development and performed validations, MT and AF assisted in the study  
7 design and manuscript development. All authors read and approved the final  
8 manuscript.

9

## 10 **Competing interests**

11 The authors have declared no competing interests.

12

## 13 **Acknowledgments**

14 This work was supported by the National ICT-R&D Fund (SRG-209),  
15 NGIRI-2020-4771, HEC (21-30SRGP/R&D/HEC/ 2014, 20-2269/NRPU/R&D/  
16 HEC/12/ 4792 and 20-3629/NRPU/R&D/HEC/14/ 585), TWAS (RG 14-319  
17 RG/ITC/AS\_C) and LUMS (STG-BIO-1008, FIF-BIO-2052, FIF-BIO-0255,  
18 SRP-185-BIO, SRP-058-BIO and FIF-477-1819-BIO) grants.

## 1 **References**

- 2 1. Hanahan D, Weinberg RA. Hallmarks of Cancer: The Next Generation. *Cell*.  
3 2011 Mar;144(5):646–74.
- 4 2. Baylin SB, Jones PA. A decade of exploring the cancer epigenome —  
5 biological and translational implications. *Nat Rev Cancer* [Internet].  
6 2011;11(10):726–34. Available from: <https://doi.org/10.1038/nrc3130>
- 7 3. Bild AH, Yao G, Chang JT, Wang Q, Potti A, Chasse D, et al. Oncogenic  
8 pathway signatures in human cancers as a guide to targeted therapies. *Nature*.  
9 2006;439(7074):353–7.
- 10 4. Harris CC, Hollstein M. Clinical implications of the p53 tumor-suppressor  
11 gene. *N Engl J Med*. 1993;329(18):1318–27.
- 12 5. Mirzoyan Z, Sollazzo M, Allocca M, Valenza AM, Grifoni D, Bellosta P.  
13 *Drosophila melanogaster*: A model organism to study cancer. *Front Genet*.  
14 2019;10(March):1–16.
- 15 6. Bujanda L, Cosme A, Gil I, Arenas-Mirave JI. Malignant colorectal polyps.  
16 Vol. 16, *World journal of gastroenterology*. 2010. p. 3103–11.
- 17 7. Hanahan D, Weinberg RA, Francisco S. The Hallmarks of Cancer Review  
18 University of California at San Francisco. 2000;100:57–70.
- 19 8. Meacham CE, Morrison SJ. Tumour heterogeneity and cancer cell plasticity.  
20 Vol. 501, *Nature*. Howard Hughes Medical Institute; 2013. p. 328–37.
- 21 9. Dagogo-Jack I, Shaw AT. Tumour heterogeneity and resistance to cancer  
22 therapies. Vol. 15, *Nature Reviews Clinical Oncology*. Nature Publishing  
23 Group; 2018. p. 81–94.
- 24 10. Szakács G, Paterson JK, Ludwig JA, Booth-Genthe C, Gottesman MM.  
25 Targeting multidrug resistance in cancer. *Nat Rev Drug Discov*.  
26 2006;5(3):219–34.
- 27 11. Ocana A, Pandiella A, Siu LL, Tannock IF. Preclinical development of  
28 molecular-targeted agents for cancer. *Nat Rev Clin Oncol* [Internet].

- 1           2011;8(4):200–9. Available from: <https://doi.org/10.1038/nrclinonc.2010.194>
- 2   12.   DiMasi JA, Reichert JM, Feldman L, Malins A. Clinical approval success rates  
3           for investigational cancer drugs. *Clin Pharmacol Ther.* 2013;94(3):329–35.
- 4   13.   Zamboni WC, Torchilin V, Patri AK, Hrkach J, Stern S, Lee R, et al. Best  
5           practices in cancer nanotechnology: perspective from NCI nanotechnology  
6           alliance. *Clin cancer Res.* 2012;18(12):3229–41.
- 7   14.   Gottesman MM, Fojo T, Bates SE. Multidrug resistance in cancer: role of  
8           ATP-dependent transporters. *Nat Rev Cancer.* 2002;2(1):48–58.
- 9   15.   Kasai Y, Cagan R. *Drosophila* as a tool for personalized medicine: a primer.  
10           *Per Med.* 2010;7(6):621–32.
- 11   16.   Grandori C, Kemp CJ. Personalized cancer models for target discovery and  
12           precision medicine. *Trends in cancer.* 2018;4(9):634–42.
- 13   17.   Gao J, Aksoy BA, Dogrusoz U, Dresdner G, Gross B, Sumer SO, et al.  
14           Integrative analysis of complex cancer genomics and clinical profiles using the  
15           cBioPortal. *Sci Signal.* 2013 Apr;6(269):p11.
- 16   18.   Lee HJ, Palm J, Grimes SM, Ji HP. The Cancer Genome Atlas Clinical  
17           Explorer: A web and mobile interface for identifying clinical-genomic driver  
18           associations. *Genome Med [Internet].* 2015;7(1):1–14. Available from:  
19           <http://dx.doi.org/10.1186/s13073-015-0226-3>
- 20   19.   Zhang J, Baran J, Cros A, Guberman JM, Haider S, Hsu J, et al. International  
21           Cancer Genome Consortium Data Portal—a one-stop shop for cancer genomics  
22           data. *Database.* 2011;2011.
- 23   20.   Zhang L, Jiang B, Wu Y, Strouthos C, Sun PZ, Su J, et al. Developing a  
24           multiscale, multi-resolution agent-based brain tumor model by graphics  
25           processing units. *Theor Biol Med Model [Internet].* 2011;8(1):46. Available  
26           from: <https://doi.org/10.1186/1742-4682-8-46>
- 27   21.   Li J, Akbani R, Zhao W, Lu Y, Weinstein JN, Mills GB, et al. Explore,  
28           visualize, and analyze functional cancer proteomic data using the cancer

- 1 proteome atlas. *Cancer Res.* 2017;77(21):e51–4.
- 2 22. Thul PJ, Lindskog C. The human protein atlas: A spatial map of the human  
3 proteome. *Protein Sci.* 2018;27(1):233–44.
- 4 23. Morgan MM, Johnson BP, Livingston MK, Schuler LA, Alarid ET, Sung KE,  
5 et al. Personalized in vitro cancer models to predict therapeutic response:  
6 Challenges and a framework for improvement. *Pharmacol Ther.* 2016;165:79–  
7 92.
- 8 24. Lieschke GJ, Currie PD. Animal models of human disease: zebrafish swim into  
9 view. *Nat Rev Genet.* 2007;8(5):353.
- 10 25. Olive KP, Tuveson DA. The use of targeted mouse models for preclinical  
11 testing of novel cancer therapeutics. *Clin Cancer Res.* 2006;12(18):5277–87.
- 12 26. Pandey UB, Nichols CD. Human Disease Models in *Drosophila melanogaster*  
13 and the Role of the Fly in Therapeutic Drug Discovery. 2011;63(2):411–36.
- 14 27. Adams MD, Celniker SE, Holt RA, Evans CA, Gocayne JD, Amanatides PG,  
15 et al. The genome sequence of *Drosophila melanogaster*. *Science* (80- ).  
16 2000;287(5461):2185–95.
- 17 28. Reiter LT, Potocki L, Chien S, Gribskov M, Bier E. A systematic analysis of  
18 human disease-associated gene sequences in *Drosophila melanogaster*.  
19 *Genome Res.* 2001 Jun;11(6):1114–25.
- 20 29. Rubin GM, Yandell MD, Wortman JR, Gabor Miklos GL, Nelson CR,  
21 Hariharan IK, et al. Comparative genomics of the eukaryotes. *Science.* 2000  
22 Mar;287(5461):2204–15.
- 23 30. Drysdale RA, Consortium F, Crosby MA, Consortium F. FlyBase: genes and  
24 gene models. *Nucleic Acids Res.* 2005;33(suppl\_1):D390–5.
- 25 31. Buchon N, Edgar B. Flygut-seq: Cell and region specific gene expression of the  
26 fly midgut [Internet]. Available from:  
27 <http://flygutseq.buchonlab.com/references>
- 28 32. Chintapalli VR, Wang J, Dow JAT. Using FlyAtlas to identify better

- 1            *Drosophila melanogaster* models of human disease. *Nat Genet.*  
2            2007;39(6):715–20.
- 3    33.    Vidal M, Wells S, Ryan A, Cagan R. ZD6474 suppresses oncogenic RET  
4            isoforms in a *Drosophila* model for type 2 multiple endocrine neoplasia  
5            syndromes and papillary thyroid carcinoma. *Cancer Res.* 2005;65(9):3538–41.
- 6    34.    Sonoshita M, Cagan RL. Modeling Human Cancers in *Drosophila* [Internet].  
7            1st ed. Vol. 121, Fly Models of Human Diseases. Elsevier Inc.; 2016. 287–309  
8            p. Available from: <http://dx.doi.org/10.1016/bs.ctdb.2016.07.008>
- 9    35.    Bangi E, Garza D, Hild M. In vivo analysis of compound activity and  
10            mechanism of action using epistasis in *Drosophila*. *J Chem Biol.* 2011;4(2):55–  
11            68.
- 12    36.    Levine BD, Cagan RL. *Drosophila* lung cancer models identify trametinib plus  
13            statin as candidate therapeutic. *Cell Rep.* 2016;14(6):1477–87.
- 14    37.    Bossen J, Uliczka K, Steen L, Pfefferkorn R, Mai MM-Q, Burkhardt L, et al.  
15            An EGFR-induced *Drosophila* lung tumor model identifies alternative  
16            combination treatments. *Mol Cancer Ther.* 2019;18(9):1659–68.
- 17    38.    Bhandari P, Shashidhara LS. Studies on human colon cancer gene APC by  
18            targeted expression in *Drosophila*. *Oncogene.* 2001;20(47):6871–80.
- 19    39.    Palmer AC, Sorger PK. Combination Cancer Therapy Can Confer Benefit via  
20            Patient-to-Patient Variability without Drug Additivity or Synergy. *Cell*  
21            [Internet]. 2017 Dec 14;171(7):1678-1691.e13. Available from:  
22            <https://pubmed.ncbi.nlm.nih.gov/29245013>
- 23    40.    Chen S-H, Lahav G. Two is better than one; toward a rational design of  
24            combinatorial therapy. *Curr Opin Struct Biol* [Internet]. 2016/08/10. 2016  
25            Dec;41:145–50. Available from: <https://pubmed.ncbi.nlm.nih.gov/27521655>
- 26    41.    Yardley DA. Drug Resistance and the Role of Combination Chemotherapy in  
27            Improving Patient Outcomes. Fentiman IS, editor. *Int J Breast Cancer*  
28            [Internet]. 2013;2013:137414. Available from:



- 1            <https://doi.org/10.1155/2013/137414>
- 2    42.    Aird RE, Cummings J, Ritchie AA, Muir M, Morris RE, Chen H, et al. In vitro  
3            and in vivo activity and cross resistance profiles of novel ruthenium (II)  
4            organometallic arene complexes in human ovarian cancer. *Br J Cancer*. 2002  
5            May;86(10):1652–7.
- 6    43.    Murayama T, Gotoh N. Patient-derived xenograft models of breast cancer and  
7            their application. *Cells*. 2019;8(6):621.
- 8    44.    Bangi E, Ang C, Smibert P, Uzilov A V, Teague AG, Antipin Y, et al. A  
9            personalized platform identifies trametinib plus zoledronate for a patient with  
10           KRAS-mutant metastatic colorectal cancer. *Sci Adv*. 2019;5(5):eaav6528.
- 11   45.    Passini E, Britton OJ, Lu HR, Rohrbacher J, Hermans AN, Gallacher DJ, et al.  
12           Human In Silico Drug Trials Demonstrate Higher Accuracy than Animal  
13           Models in Predicting Clinical Pro-Arrhythmic Cardiotoxicity. *Front Physiol*  
14           [Internet]. 2017;8:668. Available from:  
15           <https://www.frontiersin.org/article/10.3389/fphys.2017.00668>
- 16   46.    Richardson HE, Willoughby L, Humbert PO. Screening for Anti-cancer Drugs  
17           in *Drosophila*. *eLS*. 2001;1–14.
- 18   47.    Micchelli CA, Perrimon N. Evidence that stem cells reside in the adult  
19           *Drosophila* midgut epithelium. *Nature*. 2006;439(7075):475.
- 20   48.    Ohlstein B, Spradling A. The adult *Drosophila* posterior midgut is maintained  
21           by pluripotent stem cells. *Nature*. 2006;439(7075):470.
- 22   49.    Takashima S, Adams KL, Ortiz PA, Ying CT, Moridzadeh R,  
23           Younossi-Hartenstein A, et al. Development of the *Drosophila*  
24           entero-endocrine lineage and its specification by the Notch signaling pathway.  
25           *Dev Biol*. 2011;353(2):161–72.
- 26   50.    Ohlstein B, Spradling A. Multipotent *Drosophila* intestinal stem cells specify  
27           daughter cell fates by differential notch signaling. *Science* (80- ).  
28           2007;315(5814):988–92.

- 1 51. Lee M, Vasioukhin V. Cell polarity and cancer – cell and tissue polarity as a  
2 non-canonical tumor suppressor. 2008;
- 3 52. Pasco MY, Loudhaief R, Gallet A. The cellular homeostasis of the gut : what  
4 the Drosophila model points out. 2014;(October).
- 5 53. Loza-coll MA, Southall TD, Sandall SL, Brand AH, Jones DL. Regulation of  
6 Drosophila intestinal stem cell maintenance and differentiation by the  
7 transcription factor Escargot. 2014;33(24):2983–96.
- 8 54. Zeng X, Hou SX. Enteroendocrine cells are generated from stem cells through  
9 a distinct progenitor in the adult Drosophila posterior midgut. Development  
10 [Internet]. 2015;142(4):644–53. Available from:  
11 <http://dev.biologists.org/cgi/doi/10.1242/dev.113357>
- 12 55. Macara IG, McCaffrey L. Cell polarity in morphogenesis and metastasis.  
13 Philos Trans R Soc London Ser B, Biol Sci. 2013 Nov;368(1629):20130012.
- 14 56. Bidirectional Notch signaling regulates Drosophila intestinal stem cell  
15 multipotency. 2015;350(6263).
- 16 57. Snoeck V, Goddeeris B, Cox E. The role of enterocytes in the intestinal barrier  
17 function and antigen uptake. 2005;7:997–1004.
- 18 58. Wolfstetter G, Shirinian M, Stute C, Grabbe C, Hummel T, Baumgartner S, et  
19 al. Fusion of circular and longitudinal muscles in Drosophila is independent of  
20 the endoderm but further visceral muscle differentiation requires a close  
21 contact between mesoderm and endoderm. Mech Dev [Internet].  
22 2009;126(8):721–36. Available from:  
23 <http://www.sciencedirect.com/science/article/pii/S092547730900063X>
- 24 59. FlyGut-seq.
- 25 60. Martorell Ò, Merlos-Suárez A, Campbell K, Barriga FM, Christov CP,  
26 Miguel-Aliaga I, et al. Conserved mechanisms of tumorigenesis in the  
27 Drosophila adult midgut. PLoS One. 2014;9(2).
- 28 61. Markstein M, Dettorre S, Cho J, Neumuller RA, Craig-Muller S, Perrimon N.

- 1        Systematic screen of chemotherapeutics in *Drosophila* stem cell tumors. Proc
- 2        Natl Acad Sci [Internet]. 2014;111(12):4530–5. Available from:
- 3        <http://www.pnas.org/cgi/doi/10.1073/pnas.1401160111>
- 4    62.    cBioPortal for Cancer Genomics.
- 5    63.    Stone L. The feasibility and stability of large complex biological networks: a
- 6        random matrix approach. Sci Rep [Internet]. 2018 May 29;8(1):8246. Available
- 7        from: <https://pubmed.ncbi.nlm.nih.gov/29844420>
- 8    64.    Kwon Y-K, Cho K-H. Quantitative analysis of robustness and fragility in
- 9        biological networks based on feedback dynamics. Bioinformatics [Internet].
- 10       2008;24(7):987–94. Available from:
- 11       <https://doi.org/10.1093/bioinformatics/btn060>
- 12    65.    Glass L, Kauffman SA. The logical analysis of continuous, non-linear
- 13        biochemical control networks. J Theor Biol. 1973 Apr;39(1):103–29.
- 14    66.    Amcheslavsky A, Jiang J, Ip YT. Tissue damage-induced intestinal stem cell
- 15        division in *Drosophila*. Cell Stem Cell. 2009 Jan;4(1):49–61.
- 16    67.    Apidianakis Y, Pitsouli C, Perrimon N, Rahme L. Synergy between bacterial
- 17        infection and genetic predisposition in intestinal dysplasia. Proc Natl Acad
- 18        Sci U S A. 2009 Dec;106(49):20883–8.
- 19    68.    Schell JC, Wisidagama DR, Bensard C, Zhao H, Wei P, Tanner J, et al. Control
- 20        of intestinal stem cell function and proliferation by mitochondrial pyruvate
- 21        metabolism. Nat Cell Biol. 2017 Sep;19(9):1027–36.
- 22    69.    Di Biase S, Longo VD. Fasting-induced differential stress sensitization in
- 23        cancer treatment. Mol Cell Oncol. 2016 May;3(3):e1117701.
- 24    70.    Adlesic M, Frei C, Frew IJ. Cdk4 functions in multiple cell types to control
- 25        *Drosophila* intestinal stem cell proliferation and differentiation. Biol Open.
- 26        2016 Feb;5(3):237–51.
- 27    71.    O’Brien LE, Soliman SS, Li X, Bilder D. Altered modes of stem cell division
- 28        drive adaptive intestinal growth. Cell. 2011 Oct;147(3):603–14.

- 1 72. Hogan C, Dupré-Crochet S, Norman M, Kajita M, Zimmermann C, Pelling AE,  
2 et al. Characterization of the interface between normal and transformed  
3 epithelial cells. *Nat Cell Biol* [Internet]. 2009 Mar 15;11:460. Available from:  
4 <https://doi.org/10.1038/ncb1853>
- 5 73. Sancho E, Batlle E, Clevers H. SIGNALING PATHWAYS IN INTESTINAL  
6 DEVELOPMENT AND CANCER. *Annu Rev Cell Dev Biol* [Internet].  
7 2004;20(1):695–723. Available from:  
8 <https://doi.org/10.1146/annurev.cellbio.20.010403.092805>
- 9 74. Network TCGA, Muzny DM, Bainbridge MN, Chang K, Dinh HH, Drummond  
10 JA, et al. Comprehensive molecular characterization of human colon and rectal  
11 cancer. *Nature* [Internet]. 2012 Jul 18;487:330. Available from:  
12 <https://doi.org/10.1038/nature11252>
- 13 75. Oberley LW, Oberley TD, Buettner GR. Cell differentiation, aging and cancer:  
14 The possible roles of superoxide and superoxide dismutases. *Med Hypotheses*  
15 [Internet]. 1980;6(3):249–68. Available from:  
16 <http://www.sciencedirect.com/science/article/pii/0306987780901231>
- 17 76. Aleman M. Modelling colorectal cancer in *Drosophila*.
- 18 77. Piñeiro-Yáñez E, Reboiro-Jato M, Gómez-López G, Perales-Patón J, Troulé K,  
19 Rodríguez JM, et al. PanDrugs: a novel method to prioritize anticancer drug  
20 treatments according to individual genomic data. *Genome Med*. 2018;10(1):1–  
21 11.
- 22 78. Rowinsky EK, Donehower RC. Paclitaxel (taxol). *N Engl J Med*.  
23 1995;332(15):1004–14.
- 24 79. Han ES, Wen W, Dellinger TH, Wu J, Lu SA, Jove R, et al. Ruxolitinib  
25 synergistically enhances the anti-tumor activity of paclitaxel in human ovarian  
26 cancer. *Oncotarget*. 2018;9(36):24304.
- 27 80. Fruehauf JP, El-Masry M, Osann K, Parmakhtiar B, Yamamoto M, Jakowatz  
28 JG. Phase II study of pazopanib in combination with paclitaxel in patients with

- 1 metastatic melanoma. *Cancer Chemother Pharmacol*. 2018 Aug;82(2):353–60.
- 2 81. Pazopanib and Paclitaxel for Non-Small Cell Lung Cancer [Internet]. 2010.  
3 Available from: <https://clinicaltrials.gov/ct2/show/NCT01179269>
- 4 82. Pink D, Bauer S, Brodowicz T, Reichardt P, Kasper B, Richter S, et al.  
5 Treatment of angiosarcoma with pazopanib and paclitaxel: Results of the phase  
6 II trial of the German Interdisciplinary Sarcoma Group (GISG-06 EVA) study.  
7 *J Clin Oncol* [Internet]. 2018 May 20;36(15\_suppl):11570. Available from:  
8 [https://doi.org/10.1200/JCO.2018.36.15\\_suppl.11570](https://doi.org/10.1200/JCO.2018.36.15_suppl.11570)
- 9 83. Kanehisa M. KEGG: Kyoto Encyclopedia of Genes and Genomes. *Nucleic  
10 Acids Res*. 2000 Jan;28(1):27–30.
- 11 84. Yu J, Pacifico S, Liu G, Finley RL. DroID: the Drosophila Interactions  
12 Database, a comprehensive resource for annotated gene and protein  
13 interactions. *BMC Genomics*. 2008;9(1):1–9.
- 14 85. Gelbart WM, Rindone WP, Chillemi J, Russo S, Crosby M, Mathews B, et al.  
15 FlyBase: The Drosophila database. Vol. 24, *Nucleic Acids Research*. 1996. p.  
16 53–6.
- 17 86. Giot L, Bader JS, Brouwer C, Chaudhuri A, Kuang B, Li Y, et al. A Protein  
18 Interaction Map of Drosophila melanogaster. *Science* (80- ).  
19 2003;302(5651):1727–36.
- 20 87. Formstecher E, Aresta S, Collura V, Hamburger A, Meil A, Trehin A, et al.  
21 Protein interaction mapping: A Drosophila case study. *Genome Res*.  
22 2005;15(3):376–84.
- 23 88. Vinson KE, George DC, Fender AW, Bertrand FE, Sigounas G. The Notch  
24 pathway in colorectal cancer. 2016;
- 25 89. Buchon N, Broderick NA, Kuraishi T, Lemaitre B. Drosophila EGFR pathway  
26 coordinates stem cell proliferation and gut remodeling following infection.  
27 *BMC Biol*. 2010;8(1):152.
- 28 90. Xu N, Wang SQ, Tan D, Gao Y, Lin G, Xi R. EGFR, Wingless and JAK/STAT

- 1 signaling cooperatively maintain *Drosophila* intestinal stem cells. *Dev Biol.*  
2 2011;354(1):31–43.
- 3 91. Slattery ML, Lundgreen A, Kadlubar SA, Bondurant KL, Wolff RK.  
4 JAK/STAT/SOCS-signaling pathway and colon and rectal cancer. *Mol*  
5 *Carcinog.* 2013 Feb;52(2):155–66.
- 6 92. Huang T, Kang W, Cheng ASL, Yu J, To KF. The emerging role of Slit-Robo  
7 pathway in gastric and other gastro intestinal cancers. *BMC Cancer.*  
8 2015;15:950.
- 9 93. Glass L, Kauffman SA. The Logical Analysis of Continuous , Non-linear  
10 BiochemicaldaControl Networks. 1973;103–29.
- 11 94. Darabos C, Cunto F Di, Tomassini M, Moore JH, Provero P. Additive  
12 Functions in Boolean Models of Gene Regulatory Network Modules.  
13 2011;6(11).
- 14 95. Shaun J. Grannis MD, J. Marc Overhage MD PhD CJMM. Analysis of  
15 identifier performance using a deterministic linkage algorithm. *Proc AMIA*  
16 *Symp.* 2002;305–9.
- 17 96. Shah OS, Chaudhary MFA, Awan HA, Fatima F, Arshad Z, Amina B, et al.  
18 ATLANTIS - Attractor Landscape Analysis Toolbox for Cell Fate Discovery  
19 and Reprogramming. *Sci Rep [Internet].* 2018;8(1):1–11. Available from:  
20 <http://dx.doi.org/10.1038/s41598-018-22031-3>
- 21 97. Buchon N, Osman D, David FPA, Yu Fang H, Boquete J-P, Deplancke B, et al.  
22 Morphological and Molecular Characterization of Adult Midgut  
23 Compartmentalization in *Drosophila*. *Cell Rep [Internet].* 2013;3(5):1725–38.  
24 Available from:  
25 <http://www.sciencedirect.com/science/article/pii/S221112471300168X>
- 26 98. Smirnov P, Kofia V, Maru A, Freeman M, Ho C, El-Hachem N, et al.  
27 PharmacoDB: an integrative database for mining in vitro anticancer drug  
28 screening studies. *Nucleic Acids Res.* 2018;46(D1):D994–1002.



- 1 99. Griffith M, Griffith OL, Coffman AC, Weible J V, McMichael JF, Spies NC, et  
2 al. DGIdb: mining the druggable genome. *Nat Methods*. 2013;10(12):1209–10.
- 3 100. Yang W, Soares J, Greninger P, Edelman EJ, Lightfoot H, Forbes S, et al.  
4 Genomics of Drug Sensitivity in Cancer (GDSC): A resource for therapeutic  
5 biomarker discovery in cancer cells. *Nucleic Acids Res*. 2013;41(D1).
- 6 101. Wishart DS, Feunang YD, Guo AC, Lo EJ, Marcu A, Grant JR, et al.  
7 DrugBank 5.0: a major update to the DrugBank database for 2018. *Nucleic  
8 Acids Res*. 2018;46(D1):D1074–82.

9  
10  
11  
12  
13  
14  
15  
16  
17  
18  
19  
20  
21  
22  
23  
24  
25  
26  
27  
28

1 **Figure legends**

2 **Figure 1 Regulatory schema of networks for the three cell types present in**  
3 ***Drosophila melanogaster* midgut**

4 **A.** The overall scheme of six conserved pathways involved in the regulation and  
5 homeostasis of an adult *Drosophila* midgut. **B.** The mapping between input,  
6 processing, and output nodes present in the biomolecular network models of three cell  
7 types i.e. ISC, EB, and EC. **C.** Cellular fate propensities for ISC–Apical, EBs, ECs,  
8 and VM, along with their respective SEMs.

9 **Figure 2 Stack bar chart representation of cell fate propensities for intestinal**  
10 **stem cells (ISCs) in apical and basal compartments, enteroblasts (EBs) and**  
11 **enterocytes (ECs) in normal, stress and cancer conditions**

12 **A.** ISC–Apical cells adopt nine different cell fates while one remains uncharacterized  
13 in three ambient conditions. In normal conditions, the highest propensity was  
14 observed for extrusion followed by apoptosis, proliferation, and EB fate, in order. In  
15 the case of stress, the highest propensity is that of extrusion, followed by EB fate and  
16 proliferation. In cancer, the highest propensity is that of multi-layering, followed by  
17 apoptosis and extrusion. **B.** ISC–Basal adopts nine different cell fates with the highest  
18 propensity being for EE fate in normal conditions, apoptosis in stress conditions while  
19 in the case of cancer, multi-layering and apoptosis showed the highest propensity. **C.**  
20 Seven cellular fates in EB, with the highest propensity for extrusion in normal,  
21 apoptosis in stress, and multi-layering in cancer. **D.** Five cellular fates in EC, with the  
22 highest propensity for dpp production in normal, stress and cancer conditions.

23 **Figure 3 TISON output nodes propensities (*in silico* results) validation from**  
24 **FlyGut-*seq* database (*in vivo* results)**

25 **A.** Comparison of nine output nodes propensities in ISC–Apical network:  
26 adenomatous polyposis coli (*Apc2*), *cdc42* (*Cdc42*), head involution defective (*hid*),  
27 suppressor of hairless (*Su(H)*), prospero (*pros*), discs large 1 (*dlg1*), signal-transducer  
28 and activator of transcription protein at 92E (*Stat92E*), rolled (*rl*) and pangolin (*pan*).

1 **B.** Comparison of eight output nodes propensities in EB network: adenomatous  
2 polyposis coli (*Apc2*), *cdc42* (*Cdc42*), discs large 1 (*dlg1*), head involution defective  
3 (*hid*), rolled (*rl*), signal-transducer and activator of transcription protein at 92E  
4 (*Stat92E*), suppressor of hairless (*Su(H)*), and pangolin (*pan*). **C.** Comparison of  
5 seven output nodes propensities in EC network: adenomatous polyposis coli (*Apc2*),  
6 *cdc42* (*Cdc42*), discs large 1 (*dlg1*), head involution defective (*hid*), rolled (*rl*),  
7 suppressor of hairless (*Su(H)*), and pangolin (*pan*) (Table S10).

8 **Figure 4 Cell fate outcomes after the introduction of progressive CRC**  
9 **mutations and their validation against Martorell *et al.*'s *Drosophila* CRC model**

10 A high rate of extrusion and loss of polarity was observed in *Apc*-Ras as well as Ras  
11 clones. Alongside, an increased proliferation rate with a decreased apoptosis and  
12 differentiation is also highlighted by Martorell *et al.* in their *in vivo* model.

13 **Figure 5 Evaluating cell fates under therapeutic screens taken from Markstein**  
14 ***et al.*'s *Drosophila* model**

15 **A.** The effect of class I drugs on cell proliferation in wild type and CRC networks, **B.**  
16 The effect of class II drugs on apoptosis in wild type and CRC networks, **C.** The  
17 effect of class I drugs on apoptosis in wild type and CRC mutated networks, **D.** The  
18 effect of class II drugs on apoptosis in wild type and mutated networks.

19 **Figure 6 Cell fate propensities obtained from the *in vivo Drosophila Patient***  
20 **Model using Bangi *et al.*'s study**

21 **Figure 7 Comparison of oncogenic cell fate propensities obtained from**  
22 **chemotherapy + targeted therapy results versus targeted therapy results**

23 **A.** Chemotherapy + targeted therapy for ten colorectal cancer patient for personalized  
24 screening. Patient ID and mutation data were extracted from cBioPortal and cell fates  
25 for apoptosis and proliferation were plotted to observe before and after therapy  
26 results, **B.** Targeted therapy for five colorectal cancer patients for personalized  
27 screening. Patient ID and mutation data were extracted from cBioPortal and cell fates

1 for apoptosis and proliferation were plotted to observe before and after therapy  
2 results.

### 3 **Supplementary material**

#### 4 **Supplementary Figure 1 Schematic representation of regulation in Intestinal** 5 **Stem Cells**

6 Intestinal Stem Cell (ISC) in both apical and basal compartments employ six major  
7 signaling pathways including EGFR, WNT, JAK/STAT, BMP, NOTCH and Robo to  
8 maintain homeostasis and regeneration in the midgut. The inputs (green boxes) to  
9 these pathways are EGFs, Wg, Upds, Dpp, Delta and Slit, respectively. Each input is  
10 mapped to the output through an intermediate layer of nodes. The outputs (orange  
11 boxes) include Rolled, Cdc42, Hid, Dlg, Apc-Arm, TCF-LEF, STAT92E, Su(H), and  
12 Pros. The output layer is used to program cell fates which includes Extrusion,  
13 Apoptosis, Polarity, Division, Multilayering, Delta and Upd Production, EB Fate and  
14 EE Fates.

#### 15 **Supplementary Figure 2 Schematic representation of regulation in Enteroblast**

16 Enteroblasts employ five major signaling pathways including EGFR, WNT,  
17 JAK/STAT, BMP, and NOTCH. The inputs (green boxes) to these pathways are  
18 EGFs, Wg, Upds, Dpp, and Delta, respectively. Each input is mapped on to the output  
19 through an intermediate layer of nodes. The outputs (orange boxes) include Cdc42,  
20 Hid, Dlg, Apc-Arm, STAT92E, and Su(H). The output layer is used to program cell  
21 fates which include Extrusion, Apoptosis, Polarity, Multilayering, Delta and Upd  
22 Production and EC Fate.

#### 23 **Supplementary Figure 3 Schematic representation of regulation in Enterocyte**

24 Enterocytes employ four major signaling pathways including EGFR, WNT, BMP, and  
25 NOTCH. The inputs (green boxes) to these pathways are EGFs, Wg, Dpp, and Delta,  
26 respectively. Each input is mapped to the output through an intermediate layer of  
27 nodes. The outputs (orange boxes) include Cdc42, Hid, Dlg, Apc-Arm, and Su(H).

1 The output layer is used to program cell fates which include Extrusion, Apoptosis,  
2 Polarity, Multilayering, Dpp and Upd Production.

3 **Supplementary Figure 4 Schematic representation of regulation in**  
4 **Enteroendocrine**

5 Enteroendocrine cells employ four major signaling pathways including EGFR, WNT,  
6 BMP, and NOTCH. The input (green boxes) to these pathways are EGFs, Wg, Dpp,  
7 and Delta, respectively. Each input is mapped to the output through an intermediate  
8 layer of nodes. The outputs (orange boxes) include Cdc42, Hid, Dlg, Apc-Arm, and  
9 Su(H). The output layer is used to program cell fates which include Extrusion,  
10 Apoptosis, Polarity, Multilayering, and Upd Production.

11 **Supplementary Figure 5 Schematic representation of regulation in Visceral**  
12 **Muscle cells**

13 Visceral Muscle cells employ five major signaling pathways including EGFR, WNT,  
14 JAK/STAT, BMP, and NOTCH. The inputs (green boxes) to these pathways are  
15 EGFs, Wg, Upds, Dpp, and Delta, respectively. Each input is mapped on to outputs  
16 through an intermediate layer of nodes. The outputs (orange boxes) include Cdc42,  
17 Hid, Dlg, Apc-Arm, STAT92E, and Su(H). The output layer is used to program cell  
18 fates which include Apoptosis, Wnt target genes, Delta, Upd and Dpp Production.

19 **Supplementary Figure 6 TISON implementation of biomolecular pathways**  
20 **involved in regulating intestinal stem cells (apical and basal)**

21 The network contains 32 nodes and 50 edges with 6 input, 9 output and 17 processing  
22 nodes.

23 **Supplementary Figure 7 TISON implementation of biomolecular pathways**  
24 **involved in regulating Enteroblast**

25 The network contains 29 nodes and 45 edges with 5 input, 6 output and 18 processing  
26 nodes.

27 **Supplementary Figure 8 TISON implementation of biomolecular pathways**  
28 **involved in regulating Enterocyte**

1 The network contains 23 nodes and 35 edges with 4 input, 6 output and 13 processing  
2 nodes.

3 **Supplementary Figure 9 TISON implementation of biomolecular pathways**  
4 **involved in regulating Enteroendocrine**

5 The network contains 23 nodes and 35 edges with 4 input, 6 output and 13 processing  
6 nodes.

7 **Supplementary Figure 10 TISON implementation of biomolecular pathways**  
8 **involved in regulating Visceral Muscle**

9 The network contains 26 nodes and 37 edges with 5 input, 5 output and 16 processing  
10 nodes.

11 **Supplementary Figure 11 Standard Error of Means (SEM) for ISC, EB, EC**  
12 **and VM**

13 The SEM with highest for Apoptosis in ISC (0.00128), Upd production for EB  
14 (0.00287), Dpp Production for EC (0.0026) and WNT target gene fate for VM  
15 (0.0039).

16 **Supplementary Figure 12 Circos plot of biomolecular regulatory networks in**  
17 **ISC (purple), EB (blue), EC (orange), EE (red) and VM (green) cells**

18 The plots shows the interaction relationship between 5 cell types, 12 cell fates and  
19 their respective pathways.

20 **Supplementary Figure 13 Intestinal Stem Cell – Apical, in Normal Condition**

21 **Supplementary Figure 14 Intestinal Stem Cell – Apical, in Stress Condition**

22 **Supplementary Figure 15 Intestinal Stem Cell – Apical, in Cancer Condition**

23 **Supplementary Figure 16 Intestinal Stem Cell – Basal, in Normal Condition**

24 **Supplementary Figure 17 Intestinal Stem Cell – Basal, in Stress Condition**

25 **Supplementary Figure 18 Intestinal Stem Cell – Basal, in Cancer Condition**

26 **Supplementary Figure 19 Enteroblast, in Normal Condition**

27 **Supplementary Figure 20 Enteroblast, in Stress Condition**

28 **Supplementary Figure 21 Enteroblast, in Cancer Condition**

1 **Supplementary Figure 22 Enterocyte, in Normal Condition**

2 **Supplementary Figure 23 Enterocyte, in Stress Condition**

3 **Supplementary Figure 24 Enterocyte, in Cancer Condition**

4

5 **Supplementary Figure 25 Schematic of homeostasis, differentiation and**  
6 **tumorigenesis in normal and diseased midgut**

7 **A.** In normal midgut, basal ISCs maintain stemness or differentiate into EE while  
8 apical ISCs get converted into EB. EBs can then differentiate into ECs under certain  
9 conditions; however, they mostly remain dormant in homeostatic conditions. **B.** In  
10 diseased midgut, depending on the mutation type, the gut can either form  
11 adenocarcinoma or carcinoma. APC mutation can lead to development of an  
12 adenocarcinoma in the gut with a further Ras mutation can result in carcinoma.

13 **Supplementary Figure 26 Schematic Representation of Regulation in**  
14 **Mitochondria**

15 The inputs (green boxes) to these pathways are GF, Upds, Slit and Wg, respectively.  
16 Each input is mapped to the output through an intermediate layer of nodes. The  
17 outputs (orange boxes) include Stathmin, CLASP, CDK, and Apc-Arm. The output  
18 layer is used to program cell fates which includes Destabilize and Stabilize  
19 microtubule, corresponding to Proliferation and Apoptosis cell fates, respectively.

20 **Supplementary Figure 27 Schematic Representation of Regulation an**  
21 **Integrated Network of Intestinal Stem Cells and Microtubule**

22 The inputs (green boxes) to these pathways are GF, EGFs, Wg, Upds, Dpp, Delta, and  
23 Slit, respectively. Each input is mapped to the output through an intermediate layer of  
24 nodes. The outputs (orange boxes) include Rolled, Cdc42, Hid, Dlg, Apc-Arm,  
25 TCF-LEF, STAT92E, Su(H), Stathmin, CLASP, CDK and Pros. The output layer is  
26 used to program cell fates which includes Extrusion, Apoptosis, Polarity, Division,  
27 Multilayering, Delta and Upd Production, EB Fate and EE Fates.



- 1 **Supplementary Table 1 Detailed node interaction rules and experimental**
- 2 **evidences supporting different interactions and logical functions for Intestinal**
- 3 **Stem Cells (ISC) model**
- 4 **Supplementary Table 2 Detailed node interaction rules and experimental**
- 5 **evidences supporting different interactions and logical functions for Enteroblast**
- 6 **(EB) model**
- 7 **Supplementary Table 3 Detailed node interaction rules and experimental**
- 8 **evidences supporting different interactions and logical functions for Enterocyte**
- 9 **(EC) model**
- 10 **Supplementary Table 4 Detailed node interaction rules and experimental**
- 11 **evidences supporting different interactions and logical functions for**
- 12 **Enteroendocrine (EE) model**
- 13 **Supplementary Table 5 Detailed node interaction rules and experimental**
- 14 **evidences supporting different interactions and logical functions for Visceral**
- 15 **Muscle (VM) cells model**
- 16 **Supplementary Table 6 Robustness analysis cell fates and corresponding SEMs**
- 17 **for ISC, EB, EC and VM**
- 18 **Supplementary Table 7 Fixed node input states in normal, stress and cancer**
- 19 **for ISC-Apical, ISC-Basal, EB and EC network models and their literature**
- 20 **validation**
- 21 **Supplementary Table 8 Cell fate propensities of Intestinal Stem Cells (ISC) in**
- 22 **Apical and Basal compartments; Enteroblast (EB) and Enterocytes (EC) in**
- 23 **Normal, Stress and Cancer conditions along with literature validations**
- 24 **Supplementary Table 9 A comparison of model and experimental output node**
- 25 **propensities**
- 26 **Supplementary Table 10 Tabulation of network nodes, gene IDs, annotation**
- 27 **symbols, gene symbols, and FlyBase genes**

- 1 **Supplementary Table 11 Martorell *et al.*'s predictions: experiment versus**
- 2 **model**
- 3 **Supplementary Table 12 Differential gene expression comparison between**
- 4 **prediction and the model**
- 5 **Supplementary Table 13 Results of class I and class II drugs from Markstein *et***
- 6 ***al.*'s therapeutics screens**
- 7 **Supplementary Table 14 Cell fate propensities for proliferation and apoptosis**
- 8 **in class I and class II drugs**
- 9 **Supplementary Table 15 Details of the Bangi *et al.*'s case study: mutations,**
- 10 **therapy, and induction of therapy in the *in silico* DPM**
- 11 **Supplementary Table 16 Oncogenic cell fate propensities of potential target**
- 12 **nodes**
- 13 **Supplementary Table 17 Personalized therapeutic combinations for individual**
- 14 **patients**
- 15 **Supplementary Table 18 Detailed node interaction rules and experimental**
- 16 **evidences supporting different interactions and logical functions Microtubule**
- 17 **model (MT)**
- 18 **Supplementary Table 19 Detailed node interaction rules and experimental**
- 19 **evidences supporting different interactions and logical functions for Integrated**
- 20 **(ISC+MT) model**
- 21 **Supplementary Table 20 Results from chemotherapy + targeted therapy of**
- 22 **colorectal cancer patients**
- 23 **Supplementary Table 21 Results from targeted therapy of colorectal cancer**
- 24 **patients**
- 25 **Supplementary Table 22 Mapping of cell fate classification logic**
- 26 **Supplementary Table 23 Details of tumor suppressors and oncogenes in**
- 27 **ISC-Apical network**
- 28

1 **Supplementary URL link**

2 The supplementary data of manuscript titled “*In silico Drosophila Patient Model*  
3 *Reveals Optimal Combinatorial Therapies for Colorectal Cancer*” including input  
4 files, output files and analysis results are available at GitHub on this URL:

5 <https://github.com/BIRL/DrosophilaPatientModel>

6

7

8

9

10

11
